# Supplementary material for: Aggregation-induced emission of a bis(imino)acenaphthene zinc complex with tetraphenylethene units
Source: Royal Society of Chemistry journal article supplement (doi:10.1039/d2dt03525a), 2023-01-01
Supplement: d2dt03525a1.pdf [file d2dt03525a1.pdf]

## Supplementary Information

### Aggregation-induced emission of bis(imino)acenaphthene zinc complex with tetraphenylethene units

Takuma Fumoto, Ryo Tanaka\* and Yousuke Ooyama\*

*Applied Chemistry Program, Graduate School of Advanced Science and Engineering, Hiroshima University, 1-4-1 Kagamiyama, Higashi-Hiroshima 739-8527, Japan. E-mail: rytanaka@hiroshima-u.ac.jp; yooyama@hiroshima-u.ac.jp*

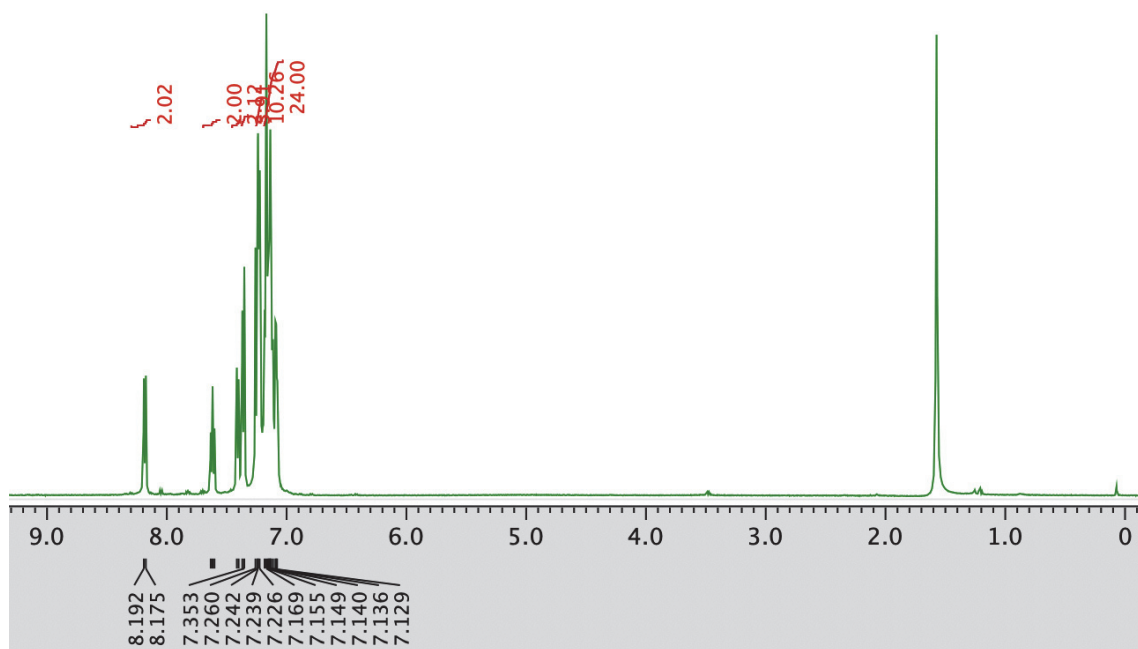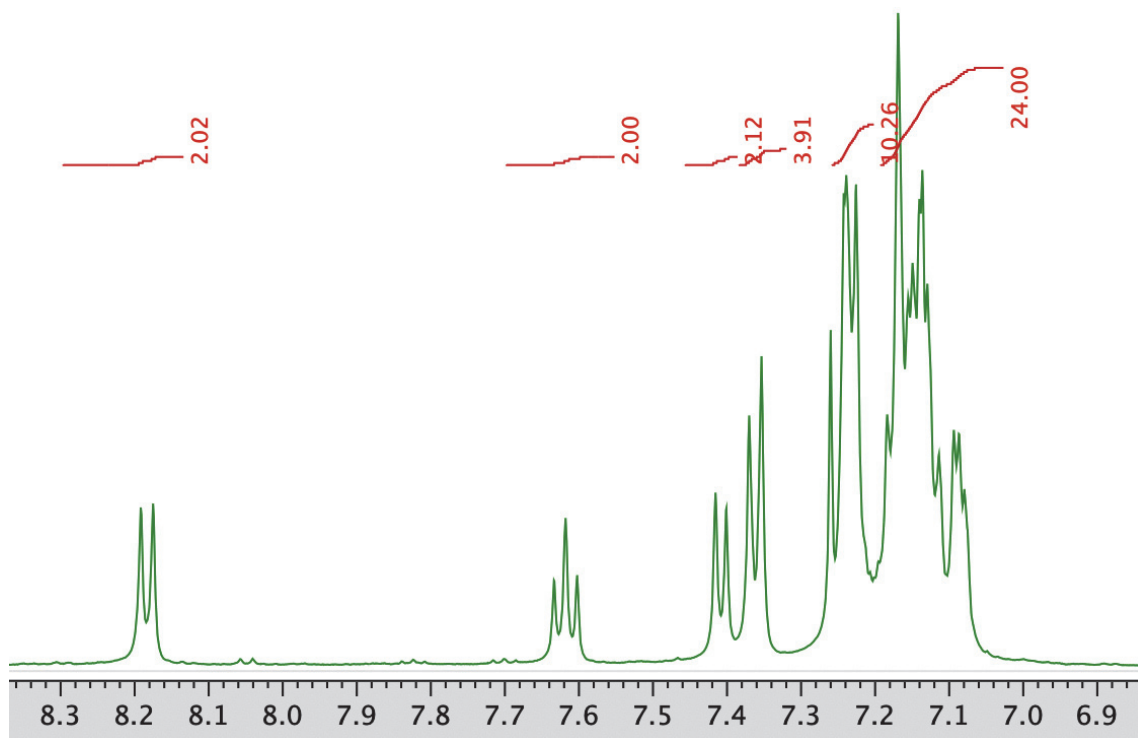

**Fig. S1**  $^1\text{H}$  NMR spectrum of zinc complex **Zn-2** (500 MHz, in  $\text{CDCl}_3$ ).

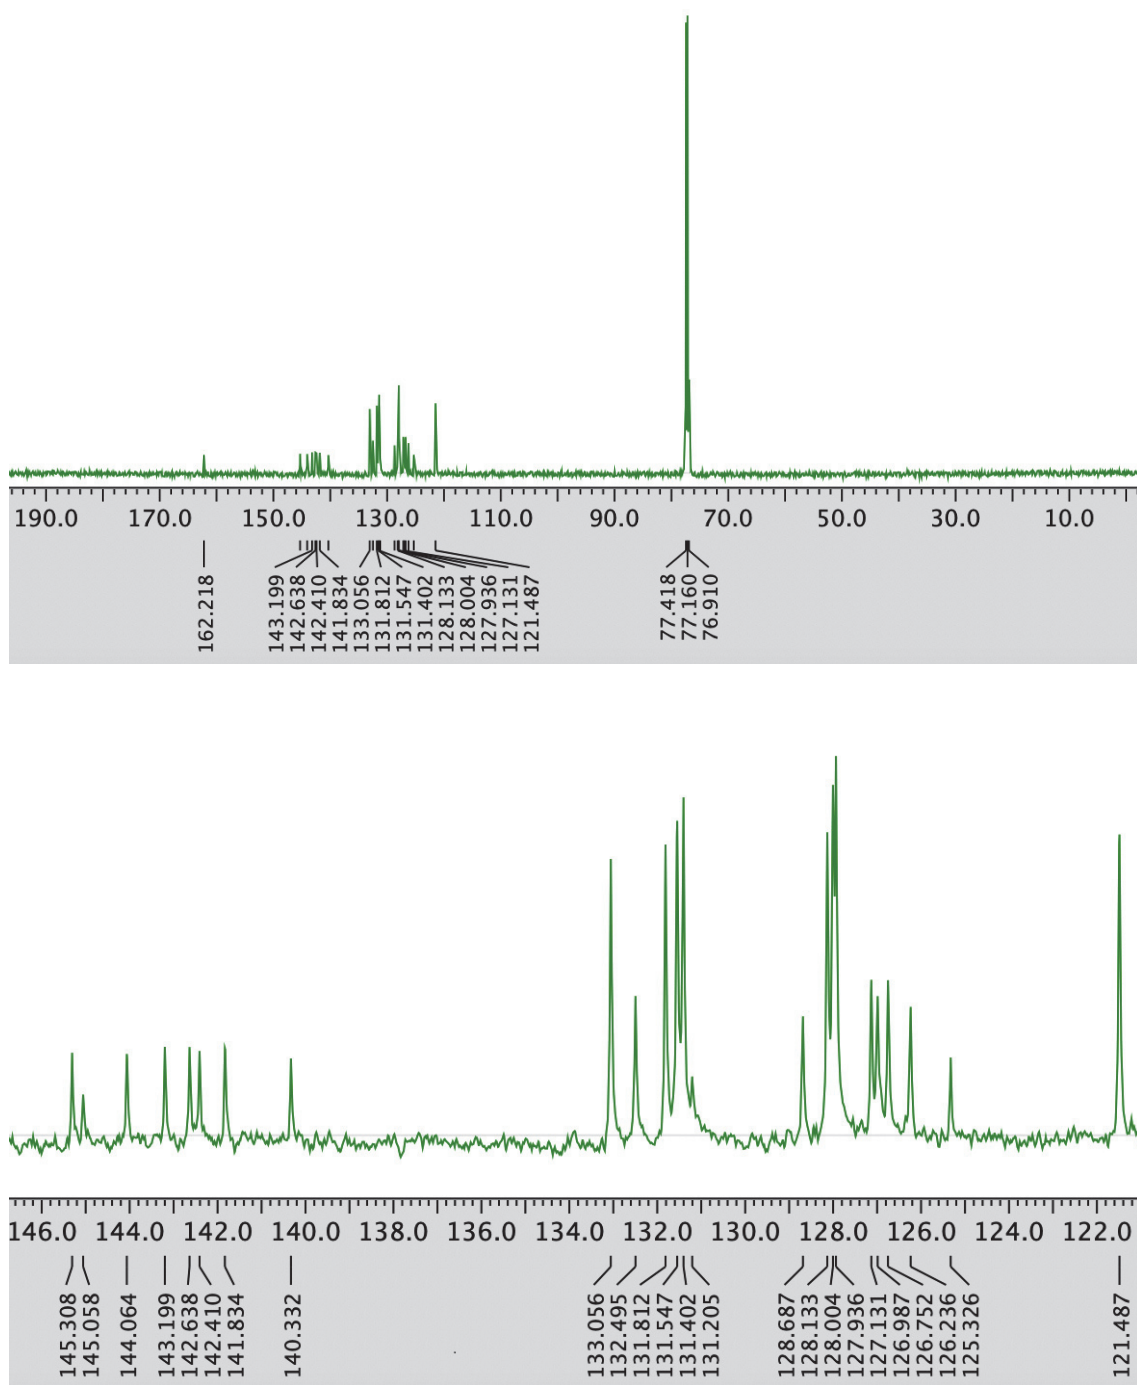

**Fig. S2**  $^{13}\text{C}$  NMR spectrum of zinc complex **Zn-2** (125 MHz, in  $\text{CDCl}_3$ ).

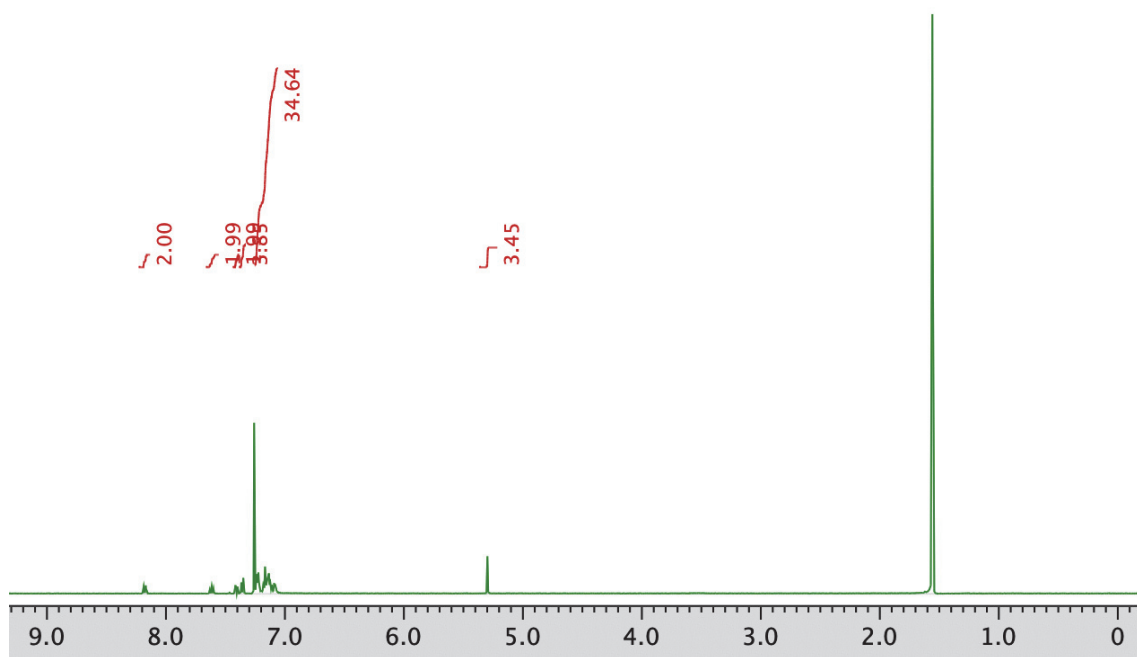

**Fig. S3**  $^1\text{H}$  NMR spectrum of **Zn-2-DCM** (500 MHz, in  $\text{CDCl}_3$ ).

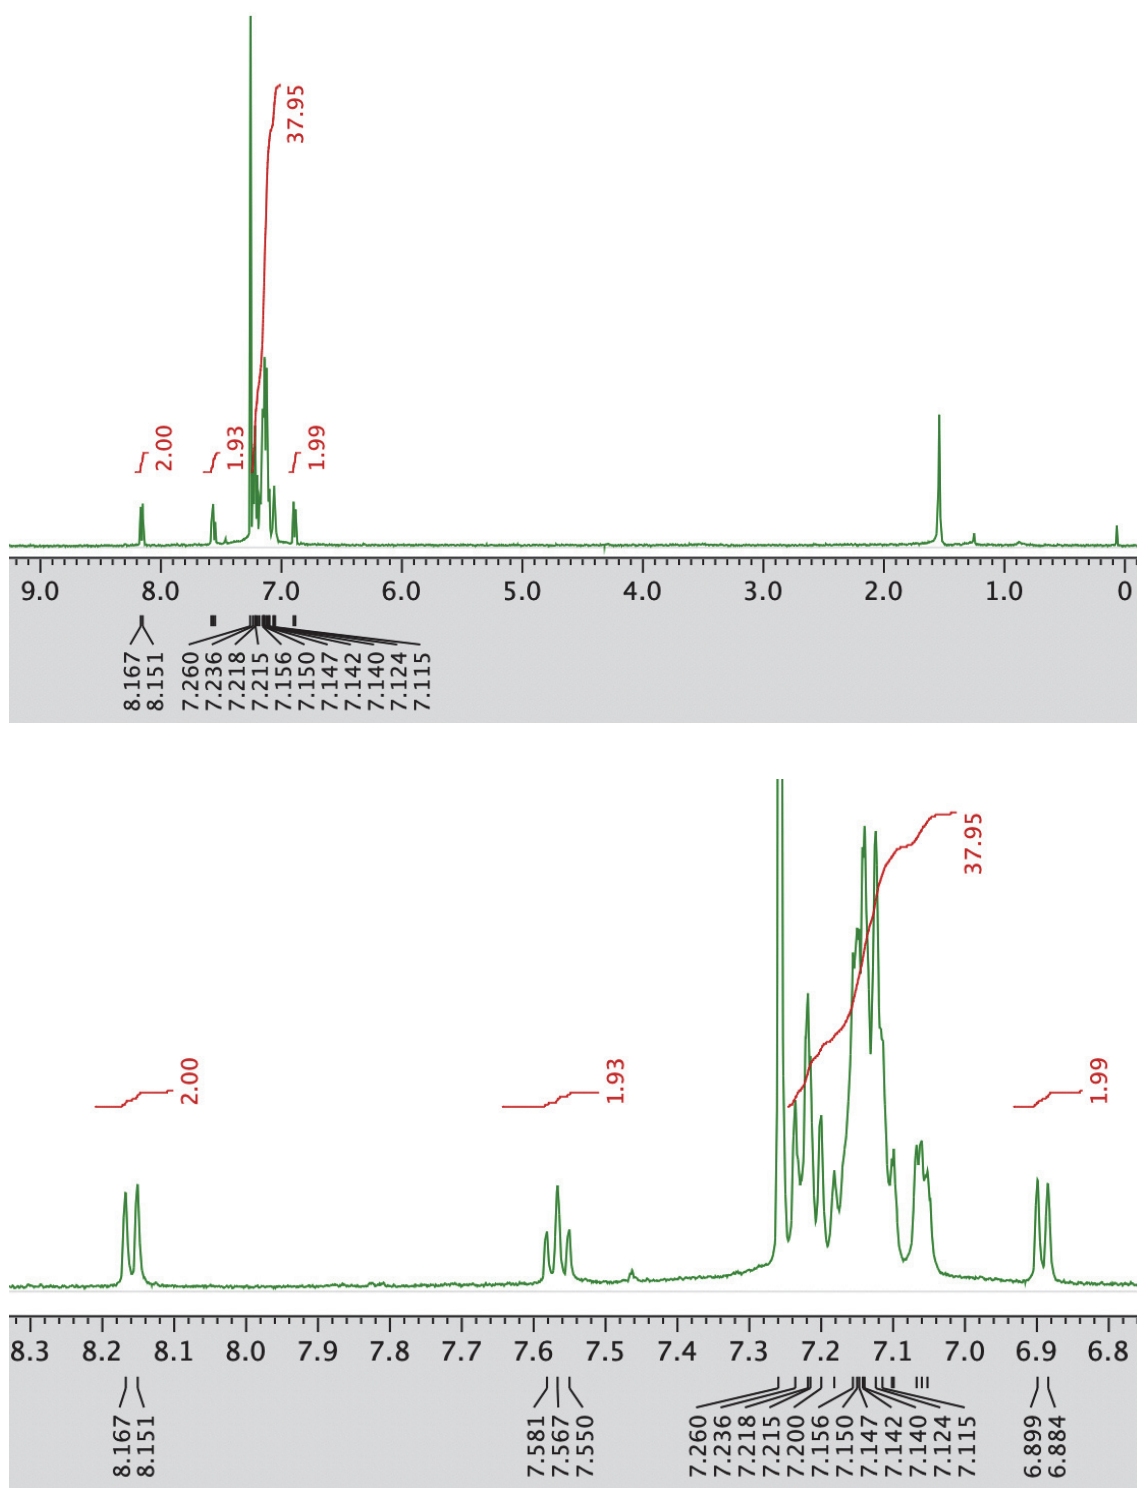

**Fig. S4**  $^1\text{H}$  NMR spectrum of palladium complex **Pd-2** (500 MHz, in  $\text{CDCl}_3$ ).

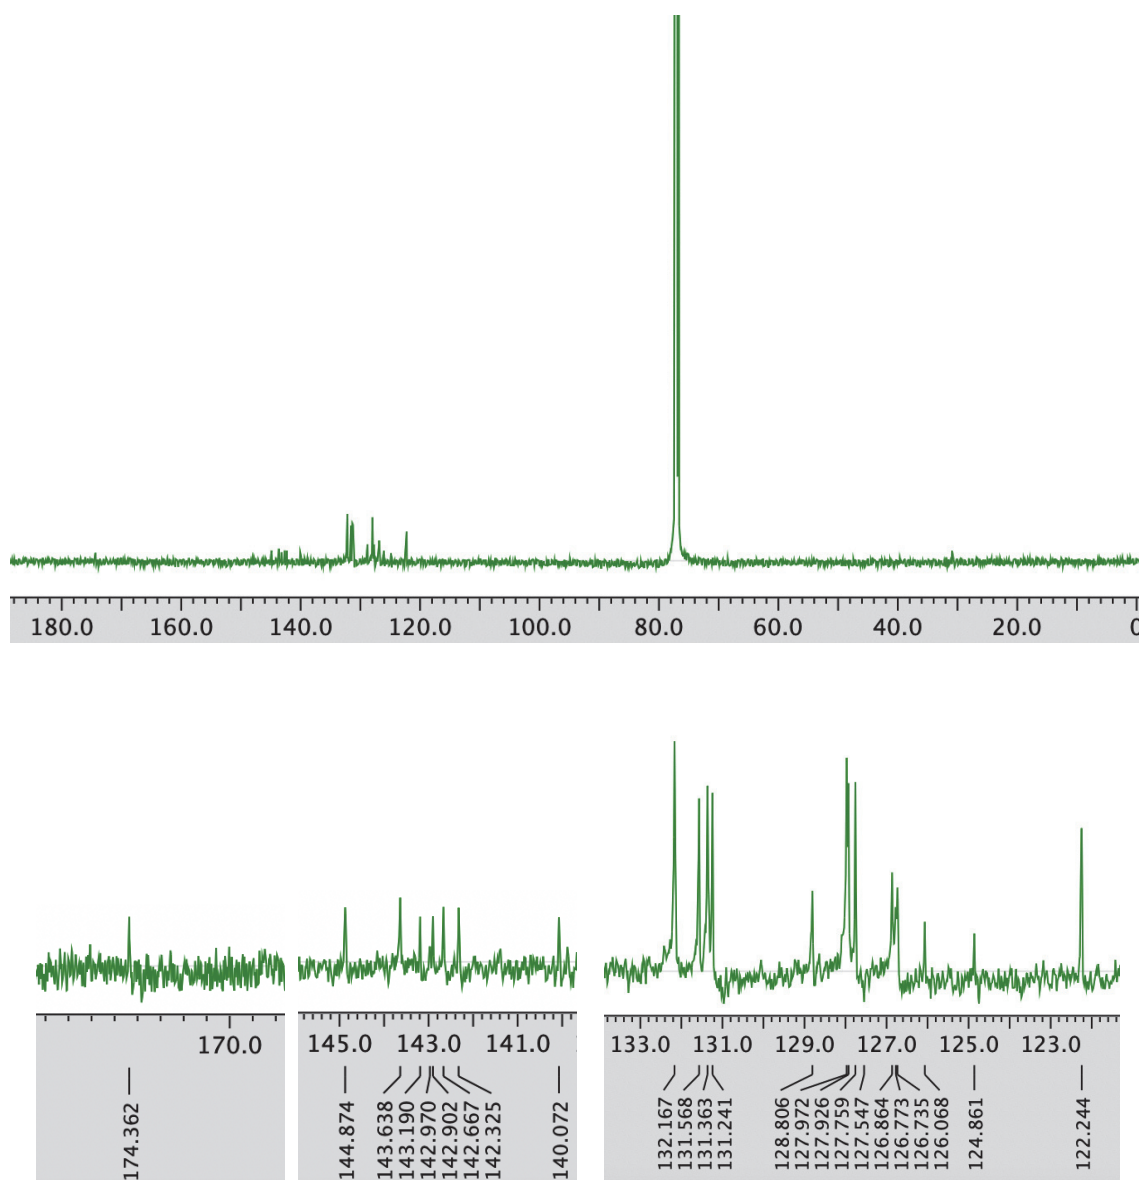

**Fig. S5**  $^{13}\text{C}$  NMR spectrum of palladium complex **Pd-2** (500 MHz, in  $\text{CDCl}_3$ ).

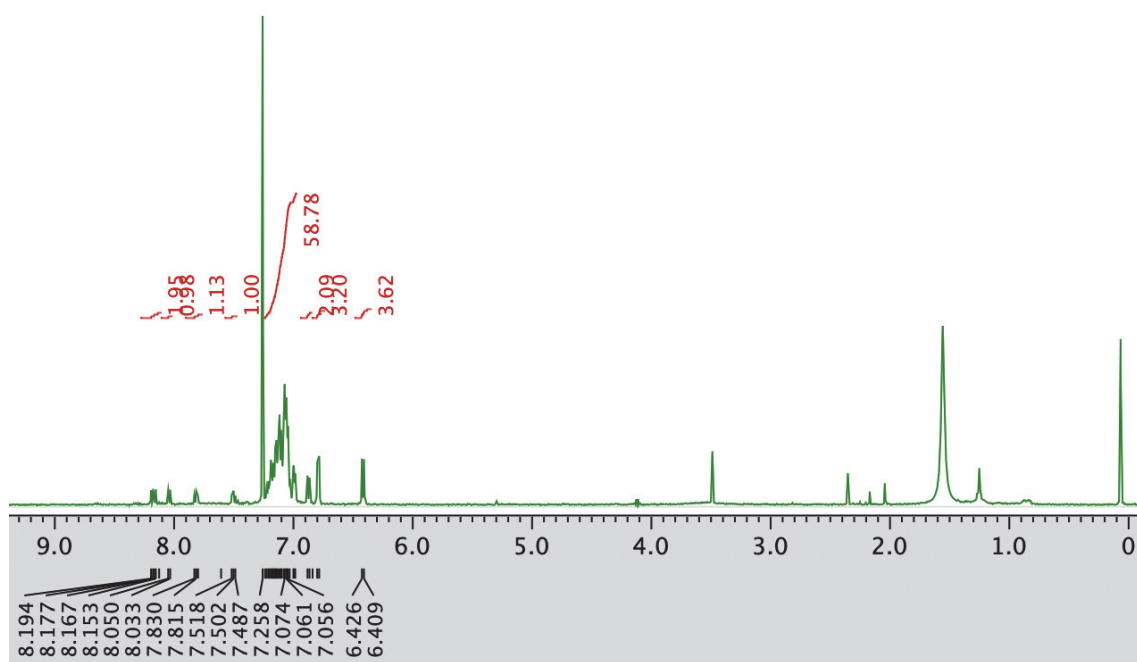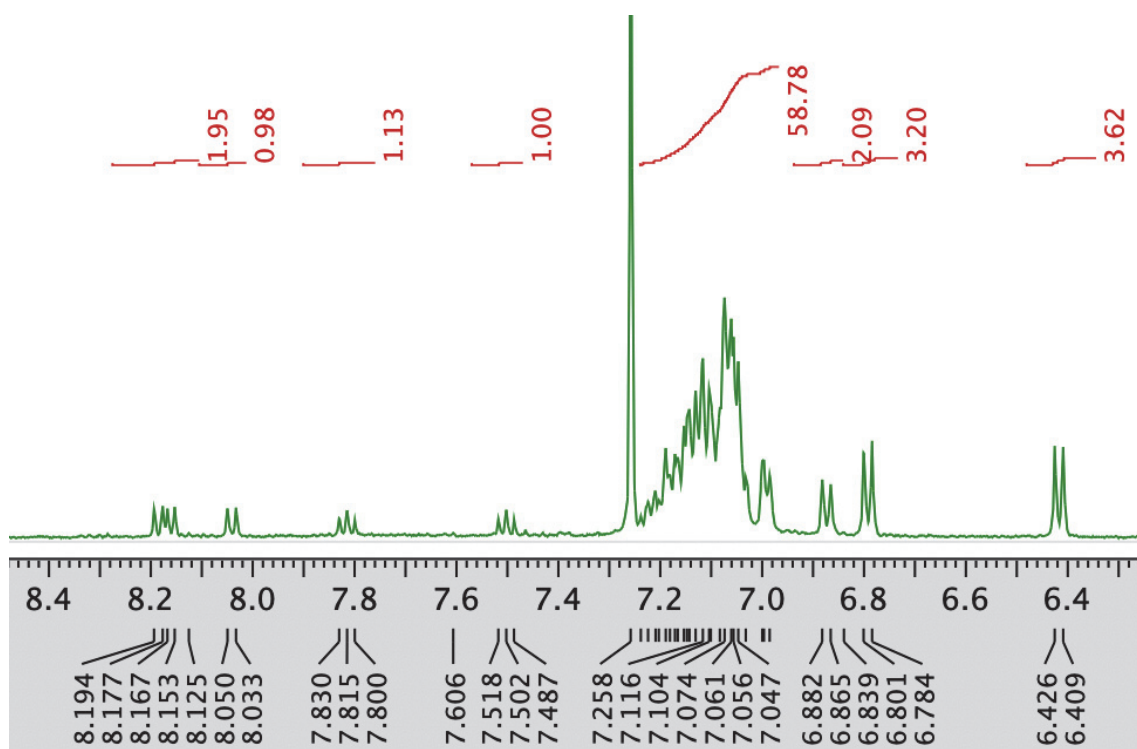

**Fig. S6**  $^1\text{H}$  NMR spectrum of the crude product after direct imine condensation between aniline **1** and acenaphthenequinone (500 MHz, in  $\text{CDCl}_3$ ).

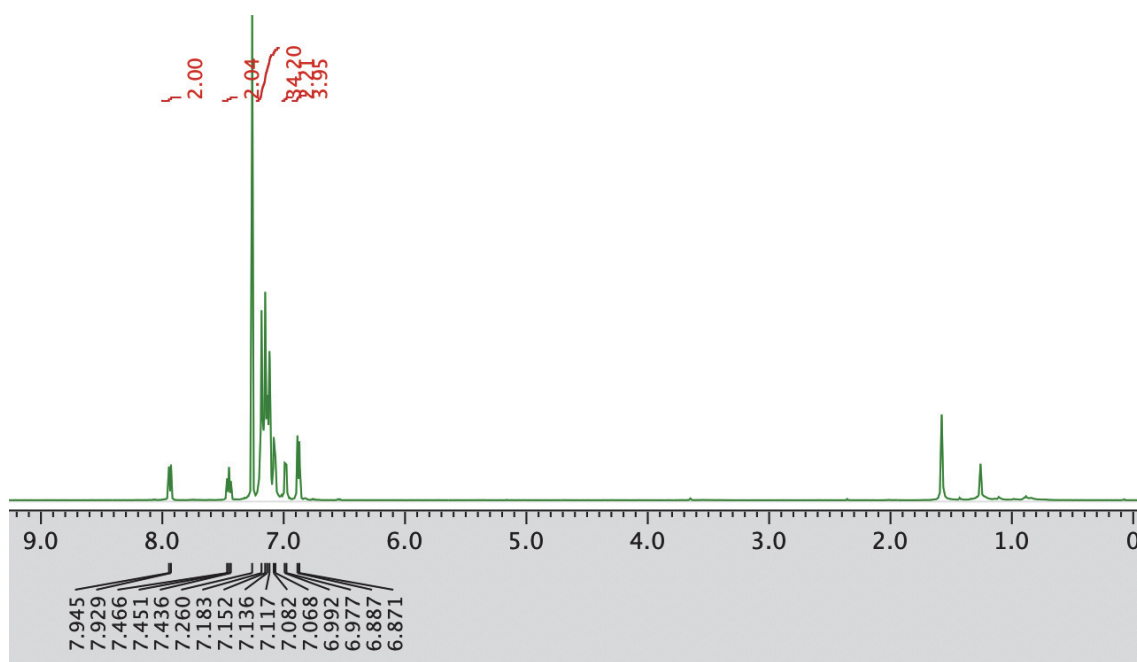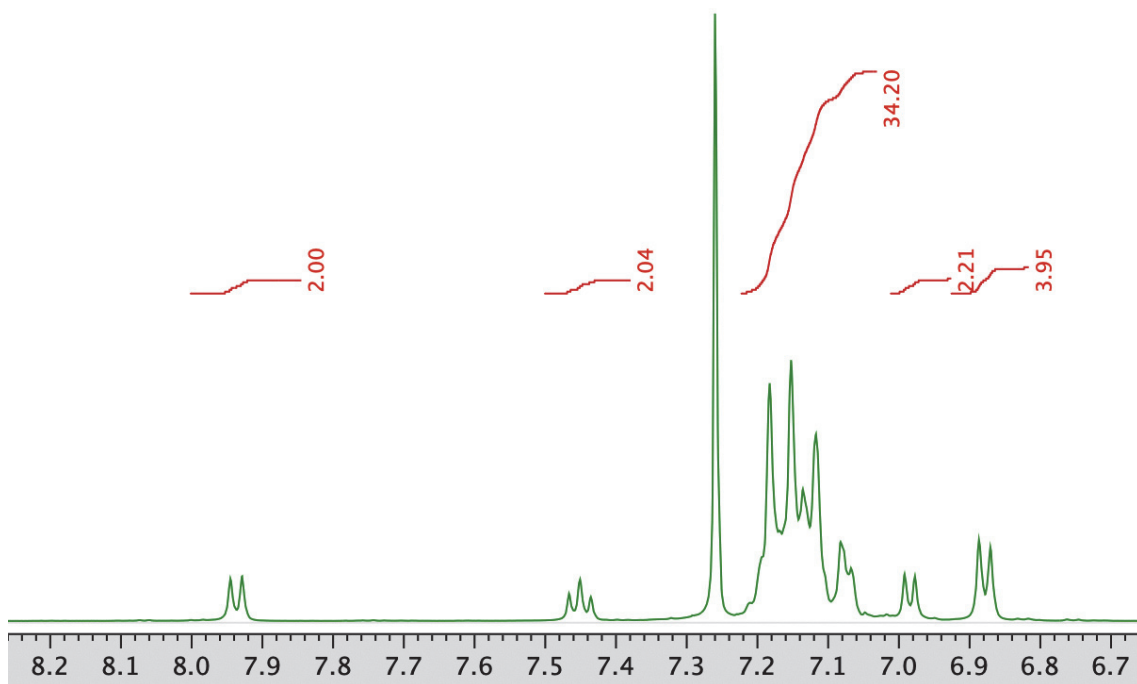

**Fig. S7** <sup>1</sup>H NMR spectrum of diimine ligand **3** (500 MHz, in CDCl<sub>3</sub>).



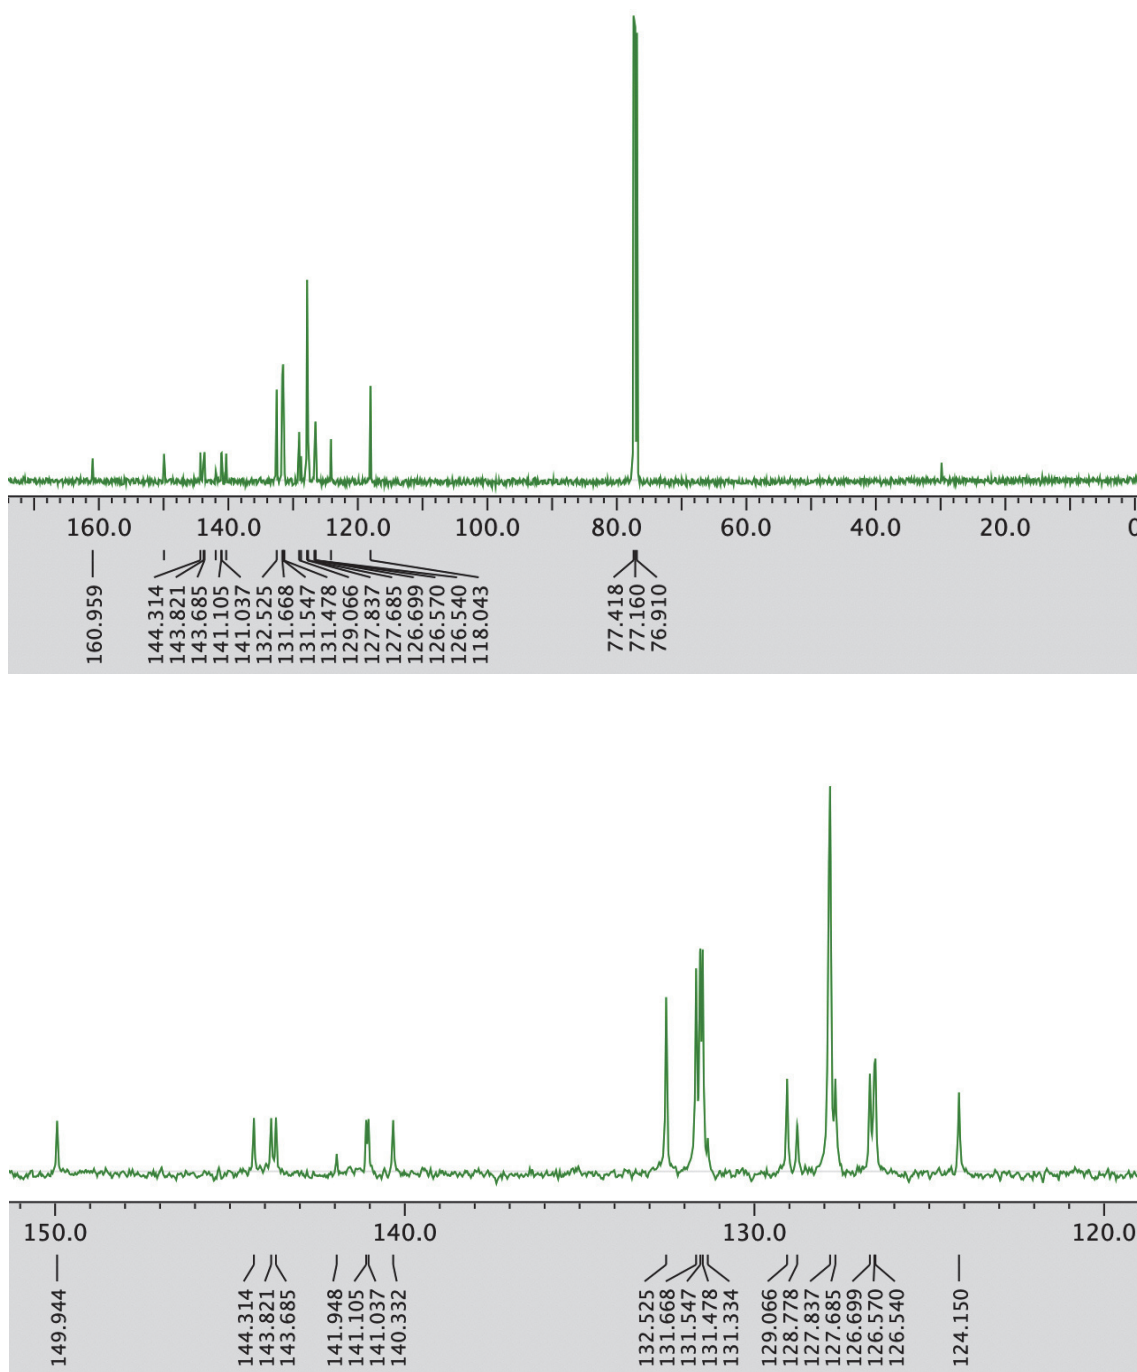

**Fig. S8**  $^{13}\text{C}$  NMR spectrum of diimine ligand **3** (125 MHz, in  $\text{CDCl}_3$ ).

**Table S1** Crystal refinement data for complexes **Zn-2-DCM** and **Pd-2-DCM**

| Compound                                          | <b>Zn-2-DCM</b>                                                   | <b>Pd-2-DCM</b>                                                   |
|---------------------------------------------------|-------------------------------------------------------------------|-------------------------------------------------------------------|
| Wavelength (Å)                                    | 0.71069 Å                                                         | 0.71069 Å                                                         |
| Temperature (K)                                   | 123                                                               | 123                                                               |
| Empirical formula                                 | C <sub>65</sub> H <sub>46</sub> Cl <sub>4</sub> N <sub>2</sub> Zn | C <sub>65</sub> H <sub>46</sub> Cl <sub>4</sub> N <sub>2</sub> Pd |
| Formula weight                                    | 1062.21                                                           | 1103.24                                                           |
| Crystal system                                    | Triclinic                                                         | Triclinic                                                         |
| Space group                                       | <i>P</i> <sup>-1</sup>                                            | <i>P</i> <sup>-1</sup>                                            |
| <i>a</i> (Å)                                      | 12.3907(3)                                                        | 12.3224(2)                                                        |
| <i>b</i> (Å)                                      | 15.0562(3)                                                        | 14.5950(3)                                                        |
| <i>c</i> (Å)                                      | 17.4004(5)                                                        | 19.1625(4)                                                        |
| $\alpha$ (deg)                                    | 105.345(2)                                                        | 102.491(2)                                                        |
| $\beta$ (deg)                                     | 105.894(2)                                                        | 92.773(1)                                                         |
| $\gamma$ (deg)                                    | 97.538(2)                                                         | 109.549(2)                                                        |
| Volume (Å <sup>3</sup> )                          | 2937.28(13)                                                       | 3143.33(11)                                                       |
| <i>Z</i>                                          | 2                                                                 | 2                                                                 |
| <i>D</i> <sub>calc</sub> (g/cm <sup>3</sup> )     | 1.201                                                             | 1.166                                                             |
| $\mu$ (mm <sup>-1</sup> )                         | 0.639                                                             | 0.502                                                             |
| <i>F</i> (000)                                    | 1096.0                                                            | 1128.0                                                            |
| Crystal size (mm)                                 | 0.23 x 0.15 x 0.15                                                | 0.30 x 0.13 x 0.12                                                |
| $\theta_{\max}$ (deg)                             | 31.527                                                            | 29.822                                                            |
| Index ranges                                      | -17 ≤ <i>h</i> ≤ 17                                               | -16 ≤ <i>h</i> ≤ 16                                               |
|                                                   | -19 ≤ <i>k</i> ≤ 21                                               | -20 ≤ <i>k</i> ≤ 20                                               |
|                                                   | -24 ≤ <i>l</i> ≤ 24                                               | -26 ≤ <i>l</i> ≤ 26                                               |
| No. of reflections observed                       | 16552                                                             | 15714                                                             |
| No. of parameters refined                         | 649                                                               | 748                                                               |
| <i>T</i> <sub>min</sub> , <i>T</i> <sub>max</sub> | 0.656, 1.000                                                      | 0.674, 1.000                                                      |
| <i>R</i> <sub>1</sub>                             | 0.0671                                                            | 0.0494                                                            |
| <i>wR</i> <sub>2</sub>                            | 0.1765                                                            | 0.1444                                                            |
| GoF on <i>F</i> <sup>2</sup>                      | 1.027                                                             | 1.056                                                             |

LUMO+1(255)

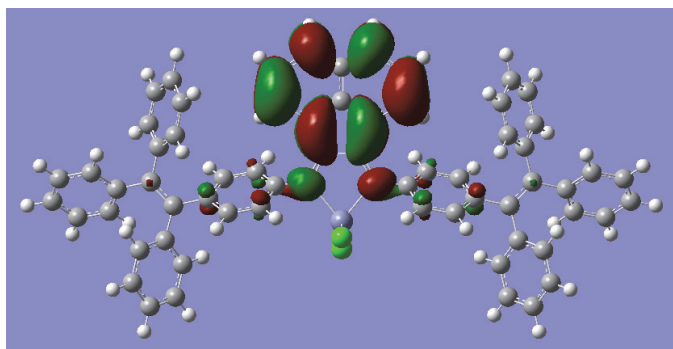

LUMO(254)

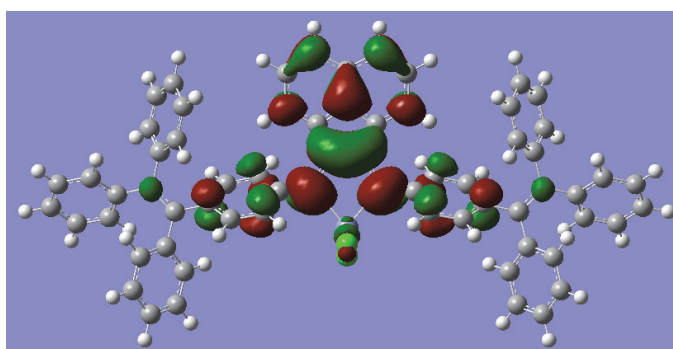

HOMO (253)

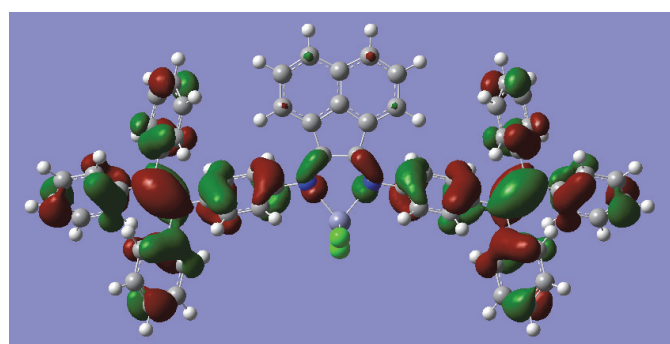

HOMO-1 (252)

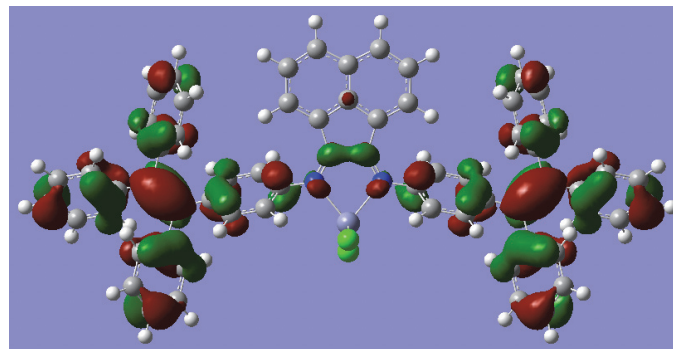

**Fig. S9** Calculated frontier orbitals of **Zn-2** derived from DFT calculations at the cc-pVTZ level.

LUMO (248)

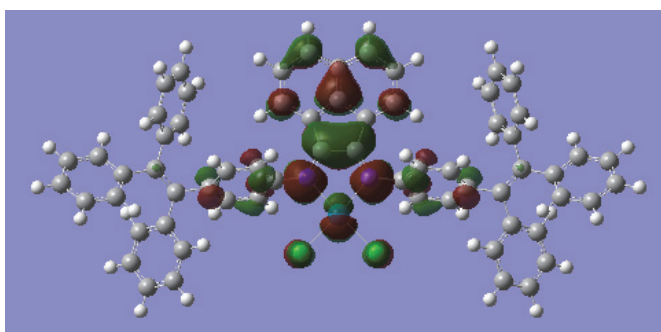

HOMO (247)

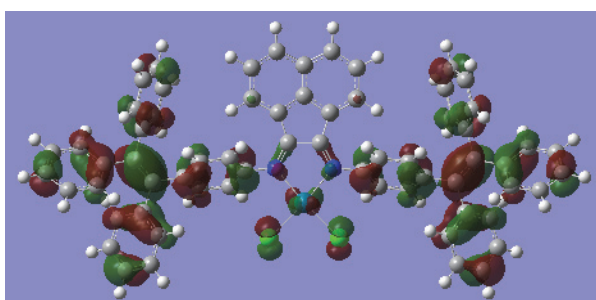

HOMO-1 (246)

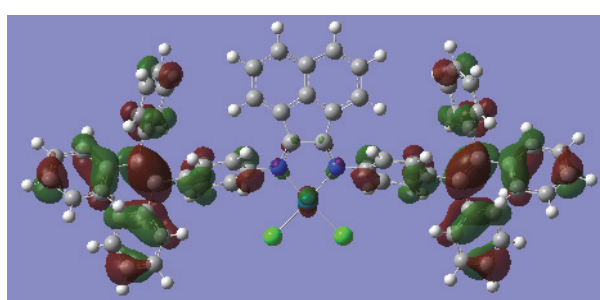

HOMO-2 (245)

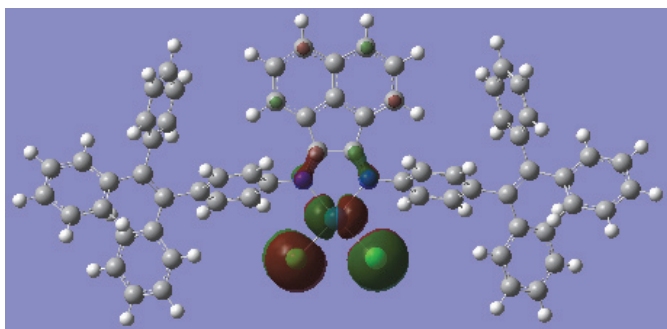

HOMO-4 (243)

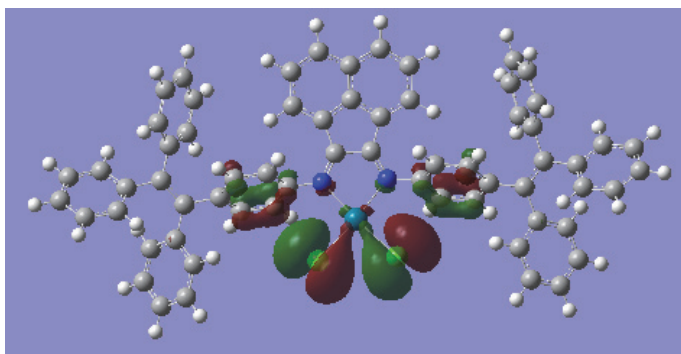

**Fig. S10** Calculated frontier orbitals of **Pd-2** derived from DFT calculations at the cc-pVTZ-PP (Pd) / cc-pVTZ (other atoms) level.

LUMO+1(223)

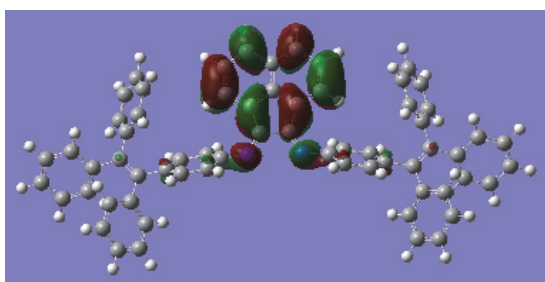

LUMO(222)

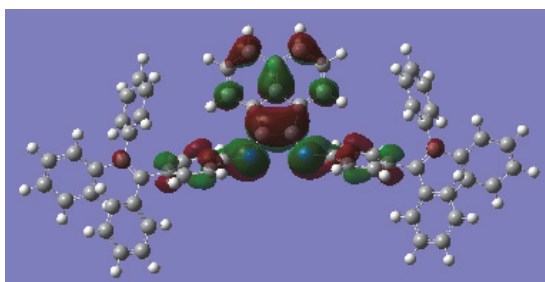

HOMO (221)

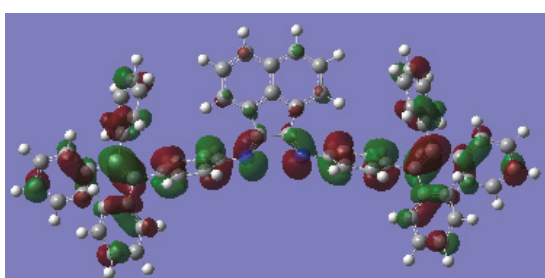

HOMO-1 (220)

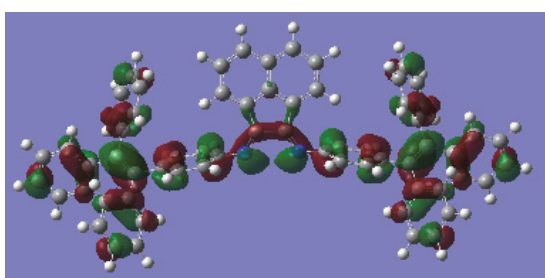

HOMO-2 (219)

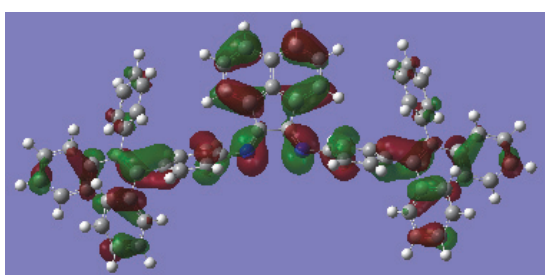

**Fig. S11** Calculated frontier orbitals of **3** derived from DFT calculations at the cc-pVTZ level.

**Table S2** Calculated electronic transition to the singlet excited states in **Zn-2** by TD-DFT method.

|            |           |          |              |
|------------|-----------|----------|--------------|
| 1.5914 eV  | 779.08 nm | f=0.3586 | <S**2>=0.000 |
| 253 -> 254 |           | 0.70650  |              |
| 1.7217 eV  | 720.12 nm | f=0.0090 | <S**2>=0.000 |
| 252 -> 254 |           | 0.70499  |              |
| 2.1052 eV  | 588.94 nm | f=0.0106 | <S**2>=0.000 |
| 253 -> 255 |           | 0.70393  |              |
| 2.1974 eV  | 564.24 nm | f=0.0348 | <S**2>=0.000 |
| 252 -> 255 |           | 0.70604  |              |

**Table S3** Calculated electronic transition to the singlet excited states in **Pd-2** by TD-DFT method.

|            |           |          |              |
|------------|-----------|----------|--------------|
| 1.5004 eV  | 826.34 nm | f=0.1288 | <S**2>=0.000 |
| 245 -> 248 |           | 0.24682  |              |
| 247 -> 248 |           | 0.65900  |              |
| 1.5817 eV  | 783.88 nm | f=0.0019 | <S**2>=0.000 |
| 246 -> 248 |           | 0.70147  |              |
| 1.5889 eV  | 780.34 nm | f=0.0623 | <S**2>=0.000 |
| 245 -> 248 |           | 0.65657  |              |
| 247 -> 248 |           | -0.24945 |              |
| 1.8268 eV  | 678.70 nm | f=0.0010 | <S**2>=0.000 |
| 243 -> 248 |           | 0.70396  |              |

**Table S4** Calculated electronic transition to the singlet excited states in **3** by TD-DFT method.

|            |           |          |              |
|------------|-----------|----------|--------------|
| 2.0994 eV  | 590.57 nm | f=0.3159 | <S**2>=0.000 |
| 221 -> 222 |           | 0.70257  |              |
| 2.2441 eV  | 552.50 nm | f=0.0106 | <S**2>=0.000 |
| 220 -> 222 |           | 0.70178  |              |
| 2.4012 eV  | 516.34 nm | f=0.0127 | <S**2>=0.000 |
| 221 -> 223 |           | 0.70455  |              |
| 2.5090 eV  | 494.16 nm | f=0.0281 | <S**2>=0.000 |
| 220 -> 223 |           | 0.70317  |              |
| 2.9013 eV  | 427.34 nm | f=0.0747 | <S**2>=0.000 |
| 217 -> 222 |           | 0.15618  |              |
| 219 -> 222 |           | 0.67011  |              |

**Table S5** Calculated electronic transition to the triplet excited states in **Zn-2** by TD-DFT method.

|            |           |          |              |
|------------|-----------|----------|--------------|
| 1.3249 eV  | 935.82 nm | f=0.0000 | <S**2>=2.000 |
| 248 -> 254 |           | -0.14758 |              |
| 250 -> 254 |           | 0.12078  |              |
| 253 -> 254 |           | 0.66548  |              |
| 1.5123 eV  | 819.83 nm | f=0.0000 | <S**2>=2.000 |
| 252 -> 254 |           | 0.67726  |              |
| 253 -> 255 |           | 0.11933  |              |
| 1.9405 eV  | 638.91 nm | f=0.0000 | <S**2>=2.000 |
| 245 -> 255 |           | -0.10086 |              |
| 248 -> 255 |           | -0.17086 |              |
| 250 -> 255 |           | 0.13519  |              |
| 252 -> 254 |           | -0.16005 |              |
| 253 -> 255 |           | 0.59964  |              |

**Table S6** Calculated electronic transition to the triplet excited states in **Pd-2** by TD-DFT method.

|            |           |              |
|------------|-----------|--------------|
| 1.2761 eV  | 971.55 nm | <S**2>=2.000 |
| 240 -> 248 |           | -0.12167     |
| 245 -> 248 |           | 0.47529      |
| 247 -> 248 |           | 0.48849      |
| 1.4508 eV  | 854.62 nm | <S**2>=2.000 |
| 241 -> 248 |           | -0.10813     |
| 242 -> 248 |           | 0.11947      |
| 246 -> 248 |           | 0.67444      |
| 1.4648 eV  | 846.41 nm | <S**2>=2.000 |
| 245 -> 248 |           | 0.50888      |
| 247 -> 248 |           | -0.47867     |

**Table S7** Energy differences in singlet and triplet states located by DFT/U-DFT methods.

| Complex     | Energy of singlet state<br>(Hartree) | Energy of triplet state<br>(Hartree) | $\Delta(T_1-S_0)$<br>(eV) |
|-------------|--------------------------------------|--------------------------------------|---------------------------|
| <b>Zn-2</b> | -5276.12136791                       | -5276.07822399                       | 1.1739                    |
| <b>Pd-2</b> | -3624.10462688                       | -3624.06007376                       | 1.2123                    |

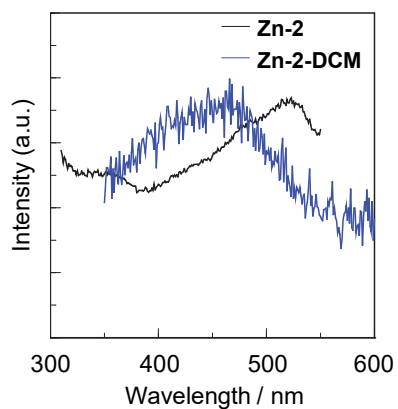

**Fig. S12** Solid-state photoexcitation spectra of **Zn-2** and **Zn-2-DCM** in the solid state.

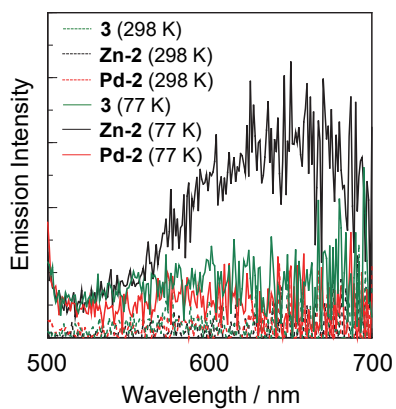

**Fig. 13** Emission spectra ( $\lambda^{\text{ex}} = 490 \text{ nm}$ ) of **3**, **Zn-2** and **Pd-2** ( $1.0 \times 10^{-4} \text{ M}$ ) in 2-MeTHF at 298 K and the glassy matrix of 2-MeTHF at 77K.
