# Supplementary material for: Aggregation-induced emission of a bis(imino)acenaphthene zinc complex with tetraphenylethene units
Source: Royal Society of Chemistry journal article supplement (doi:10.1039/d2dt03525a), 2023-01-01
Supplement: d2dt03525a2.pdf [file d2dt03525a2.pdf]

110

Optimized structure of singlet state of 3

|   |          |          |          |
|---|----------|----------|----------|
| N | 1.39973  | 0.40421  | -0.50408 |
| N | -1.39974 | 0.40419  | -0.5041  |
| C | 0.76194  | -0.71077 | -0.51694 |
| C | -0.76194 | -0.71078 | -0.51696 |
| C | -1.18812 | -2.13218 | -0.58412 |
| C | -2.41366 | -2.77984 | -0.66123 |
| H | -3.35426 | -2.23119 | -0.63323 |
| C | -2.43353 | -4.19554 | -0.774   |
| H | -3.40232 | -4.69726 | -0.82475 |
| C | -1.27292 | -4.9551  | -0.81756 |
| H | -1.33219 | -6.04281 | -0.90421 |
| C | 0.00004  | -4.32194 | -0.75632 |
| C | 1.27301  | -4.95508 | -0.81752 |
| H | 1.3323   | -6.04278 | -0.90417 |
| C | 2.4336   | -4.19549 | -0.77392 |
| H | 3.40241  | -4.69719 | -0.82464 |
| C | 2.41371  | -2.77979 | -0.66115 |
| H | 3.35429  | -2.23112 | -0.63312 |
| C | 1.18815  | -2.13216 | -0.58409 |
| C | 0.00002  | -2.91125 | -0.6352  |
| C | -2.79116 | 0.50463  | -0.39362 |
| C | -3.49589 | 0.02153  | 0.72846  |
| H | -2.95094 | -0.50078 | 1.51768  |
| C | -4.86776 | 0.23491  | 0.84623  |
| H | -5.39292 | -0.13734 | 1.72804  |
| C | -5.59065 | 0.93228  | -0.14231 |
| C | -4.86826 | 1.4467   | -1.23925 |
| H | -5.39663 | 2.01734  | -2.00644 |
| C | -3.49593 | 1.24681  | -1.36265 |
| H | -2.94558 | 1.65611  | -2.21152 |
| C | -7.05211 | 1.18565  | -0.00098 |
| C | -7.47925 | 2.59245  | -0.26065 |
| C | -8.58098 | 2.88005  | -1.09003 |
| H | -9.14317 | 2.05627  | -1.53382 |

|   |           |          |          |
|---|-----------|----------|----------|
| C | -8.95222  | 4.19983  | -1.35548 |
| H | -9.80552  | 4.40006  | -2.00773 |
| C | -8.23329  | 5.26167  | -0.79486 |
| H | -8.52573  | 6.29378  | -1.00115 |
| C | -7.13018  | 4.99167  | 0.0227   |
| H | -6.55877  | 5.81326  | 0.46105  |
| C | -6.75002  | 3.67175  | 0.27723  |
| H | -5.88101  | 3.46786  | 0.90695  |
| C | -7.93914  | 0.19553  | 0.3453   |
| C | -7.57009  | -1.25129 | 0.31536  |
| C | -6.94709  | -1.81882 | -0.81363 |
| H | -6.70821  | -1.18025 | -1.66629 |
| C | -6.6502   | -3.18329 | -0.85865 |
| H | -6.18375  | -3.60483 | -1.75274 |
| C | -6.96059  | -4.00993 | 0.22786  |
| H | -6.72938  | -5.07714 | 0.19244  |
| C | -7.58483  | -3.46122 | 1.35376  |
| H | -7.83603  | -4.09795 | 2.20533  |
| C | -7.89818  | -2.10024 | 1.39113  |
| H | -8.39949  | -1.68174 | 2.26689  |
| C | -9.34096  | 0.47918  | 0.7715   |
| C | -10.41143 | -0.28665 | 0.26709  |
| H | -10.20707 | -1.07689 | -0.45899 |
| C | -11.72472 | -0.04077 | 0.67473  |
| H | -12.54066 | -0.63739 | 0.25982  |
| C | -11.99507 | 0.96112  | 1.61349  |
| H | -13.02099 | 1.14864  | 1.93849  |
| C | -10.93956 | 1.71395  | 2.14056  |
| H | -11.13768 | 2.4885   | 2.88517  |
| C | -9.62798  | 1.47716  | 1.72373  |
| H | -8.80915  | 2.06515  | 2.14244  |
| C | 2.79114   | 0.50466  | -0.3936  |
| C | 3.49591   | 1.24687  | -1.3626  |
| H | 2.94555   | 1.6562   | -2.21146 |
| C | 11.99507  | 0.96109  | 1.61347  |
| H | 13.02099  | 1.1486   | 1.93846  |

|   |          |          |          |
|---|----------|----------|----------|
| C | 4.86824  | 1.44676  | -1.23921 |
| H | 5.39661  | 2.01742  | -2.00638 |
| C | 5.59063  | 0.9323   | -0.14229 |
| C | 4.86774  | 0.23489  | 0.84623  |
| H | 5.39291  | -0.13739 | 1.72802  |
| C | 3.49588  | 0.02152  | 0.72846  |
| H | 2.95093  | -0.50083 | 1.51766  |
| C | 7.0521   | 1.18566  | -0.00096 |
| C | 7.47923  | 2.59247  | -0.26058 |
| C | 6.75     | 3.67176  | 0.27734  |
| H | 5.881    | 3.46785  | 0.90705  |
| C | 7.13016  | 4.99168  | 0.02285  |
| H | 6.55874  | 5.81326  | 0.46122  |
| C | 8.23326  | 5.26171  | -0.79471 |
| H | 8.5257   | 6.29383  | -1.00096 |
| C | 8.9522   | 4.19989  | -1.35536 |
| H | 9.8055   | 4.40015  | -2.00761 |
| C | 8.58096  | 2.88011  | -1.08995 |
| H | 9.14315  | 2.05634  | -1.53377 |
| C | 7.93913  | 0.19554  | 0.34529  |
| C | 7.57008  | -1.25128 | 0.31529  |
| C | 7.89818  | -2.10027 | 1.39104  |
| H | 8.39949  | -1.6818  | 2.26681  |
| C | 7.58483  | -3.46125 | 1.35361  |
| H | 7.83603  | -4.09801 | 2.20516  |
| C | 6.96059  | -4.00992 | 0.2277   |
| H | 6.72938  | -5.07713 | 0.19224  |
| C | 6.6502   | -3.18325 | -0.85878 |
| H | 6.18374  | -3.60475 | -1.75288 |
| C | 6.94708  | -1.81877 | -0.81372 |
| H | 6.7082   | -1.18017 | -1.66635 |
| C | 9.34095  | 0.47918  | 0.77148  |
| C | 9.62798  | 1.47712  | 1.72375  |
| H | 8.80915  | 2.06509  | 2.14249  |
| C | 10.93957 | 1.71389  | 2.14057  |
| H | 11.13769 | 2.48842  | 2.88521  |

|   |          |          |          |
|---|----------|----------|----------|
| C | 11.72471 | -0.04077 | 0.67467  |
| H | 12.54064 | -0.63737 | 0.25973  |
| C | 10.41142 | -0.28664 | 0.26703  |
| H | 10.20706 | -1.07685 | -0.45908 |
