# Supplementary material for: Aggregation-induced emission of a bis(imino)acenaphthene zinc complex with tetraphenylethene units
Source: Royal Society of Chemistry journal article supplement (doi:10.1039/d2dt03525a), 2023-01-01
Supplement: d2dt03525a3.pdf [file d2dt03525a3.pdf]

113

Optimized structure of singlet ground state of Pd-2

|    |          |          |          |
|----|----------|----------|----------|
| Pd | 0.00006  | -1.69387 | -0.22248 |
| Cl | 1.62731  | -3.31532 | -0.05852 |
| Cl | -1.62698 | -3.31548 | -0.0582  |
| N  | 1.33884  | -0.10125 | -0.33206 |
| N  | -1.33884 | -0.10127 | -0.33192 |
| C  | 0.74151  | 1.06361  | -0.35783 |
| C  | 1.19267  | 2.45735  | -0.48043 |
| C  | 2.41893  | 3.10193  | -0.57791 |
| H  | 3.36032  | 2.55677  | -0.52523 |
| C  | 2.4352   | 4.51176  | -0.74423 |
| H  | 3.40358  | 5.01109  | -0.81189 |
| C  | 1.27342  | 5.26748  | -0.81706 |
| H  | 1.33194  | 6.35099  | -0.94371 |
| C  | -0.00007 | 4.63662  | -0.73234 |
| C  | -0.00005 | 3.23489  | -0.55892 |
| C  | -1.27359 | 5.26745  | -0.81698 |
| H  | -1.33214 | 6.35096  | -0.94362 |
| C  | -2.43534 | 4.5117   | -0.74409 |
| H  | -3.40373 | 5.011    | -0.81168 |
| C  | -2.41902 | 3.10187  | -0.5778  |
| H  | -3.36039 | 2.55668  | -0.5251  |
| C  | -1.19273 | 2.45732  | -0.48036 |
| C  | -0.74154 | 1.06359  | -0.35777 |
| C  | 2.75536  | -0.2069  | -0.26553 |
| C  | 3.44031  | -0.93627 | -1.24916 |
| H  | 2.88067  | -1.39378 | -2.06411 |
| C  | 4.82394  | -1.06965 | -1.16728 |
| H  | 5.35039  | -1.64099 | -1.93407 |
| C  | 5.55444  | -0.50538 | -0.10201 |
| C  | 4.84168  | 0.19095  | 0.89524  |
| H  | 5.37908  | 0.59551  | 1.7543   |
| C  | 3.45895  | 0.34037  | 0.81933  |
| H  | 2.91273  | 0.84793  | 1.61683  |
| C  | 7.02278  | -0.73199 | 0.02182  |

|   |          |          |          |
|---|----------|----------|----------|
| C | 7.46124  | -2.14045 | -0.20261 |
| C | 6.72342  | -3.21304 | 0.33832  |
| H | 5.83617  | -3.00751 | 0.9413   |
| C | 7.11358  | -4.53526 | 0.11262  |
| H | 6.53159  | -5.35044 | 0.54796  |
| C | 8.23574  | -4.8136  | -0.67516 |
| H | 8.53519  | -5.84783 | -0.85919 |
| C | 8.96349  | -3.75874 | -1.2382  |
| H | 9.83052  | -3.96668 | -1.8695  |
| C | 8.5818   | -2.43648 | -1.00408 |
| H | 9.14918  | -1.61879 | -1.45243 |
| C | 7.89399  | 0.28377  | 0.33265  |
| C | 7.49697  | 1.72077  | 0.25377  |
| C | 7.81027  | 2.61392  | 1.29806  |
| H | 8.3211   | 2.23684  | 2.18693  |
| C | 7.47046  | 3.96605  | 1.21236  |
| H | 7.71083  | 4.63792  | 2.03962  |
| C | 6.83566  | 4.46224  | 0.06769  |
| H | 6.58832  | 5.52387  | -0.00691 |
| C | 6.53979  | 3.59167  | -0.9881  |
| H | 6.06882  | 3.97262  | -1.89799 |
| C | 6.86193  | 2.23506  | -0.89394 |
| H | 6.63895  | 1.56241  | -1.72451 |
| C | 9.30181  | 0.04057  | 0.76182  |
| C | 9.60799  | -0.92533 | 1.74096  |
| H | 8.80143  | -1.5194  | 2.17456  |
| C | 10.92368 | -1.12218 | 2.16462  |
| H | 11.13758 | -1.87151 | 2.9302   |
| C | 11.9634  | -0.36204 | 1.61666  |
| H | 12.99273 | -0.51926 | 1.94672  |
| C | 11.67354 | 0.60736  | 0.65021  |
| H | 12.47734 | 1.20854  | 0.21875  |
| C | -2.75533 | -0.20698 | -0.26537 |
| C | -3.45897 | 0.34045  | 0.8194   |
| H | -2.91278 | 0.84815  | 1.61682  |
| C | -4.84169 | 0.19099  | 0.89529  |

|   |           |          |          |
|---|-----------|----------|----------|
| H | -5.37913  | 0.5957   | 1.75427  |
| C | -5.55442  | -0.5055  | -0.10186 |
| C | -4.82388  | -1.06994 | -1.16701 |
| H | -5.3503   | -1.64142 | -1.93374 |
| C | -3.44025  | -0.93654 | -1.24889 |
| H | -2.88059  | -1.39419 | -2.06374 |
| C | -7.02278  | -0.73207 | 0.02195  |
| C | -7.89398  | 0.28375  | 0.33258  |
| C | 10.35563  | 0.8146   | 0.23581  |
| H | 10.13566  | 1.57929  | -0.51271 |
| C | -9.30183  | 0.04058  | 0.76174  |
| C | -10.35566 | 0.81445  | 0.23551  |
| H | -10.13569 | 1.57899  | -0.51317 |
| C | -11.67357 | 0.60724  | 0.6499   |
| H | -12.47738 | 1.20828  | 0.21828  |
| C | -11.96343 | -0.36195 | 1.61656  |
| H | -12.99277 | -0.51916 | 1.9466   |
| C | -10.92369 | -1.12192 | 2.16475  |
| H | -11.1376  | -1.87108 | 2.93048  |
| C | -9.60799  | -0.9251  | 1.74109  |
| H | -8.80141  | -1.51902 | 2.17487  |
| C | -6.86181  | 2.23484  | -0.89425 |
| H | -6.63865  | 1.56203  | -1.72465 |
| C | -6.53972  | 3.59145  | -0.98863 |
| H | -6.06862  | 3.97223  | -1.89851 |
| C | -6.83583  | 4.46221  | 0.06693  |
| H | -6.58853  | 5.52384  | -0.00785 |
| C | -7.47081  | 3.96623  | 1.21159  |
| H | -7.71138  | 4.63825  | 2.03866  |
| C | -7.81057  | 2.6141   | 1.2975   |
| H | -8.32154  | 2.23717  | 2.18635  |
| C | -7.49702  | 1.72074  | 0.25345  |
| C | -7.46124  | -2.14056 | -0.20231 |
| C | -8.58173  | -2.4367  | -1.00384 |
| H | -9.14906  | -1.61907 | -1.45235 |
| C | -8.9634   | -3.75899 | -1.2378  |

|   |          |          |          |
|---|----------|----------|----------|
| H | -9.83038 | -3.96702 | -1.86915 |
| C | -8.23572 | -4.81378 | -0.67453 |
| H | -8.53516 | -5.84803 | -0.85845 |
| C | -7.11362 | -4.53533 | 0.1133   |
| H | -6.53168 | -5.35045 | 0.54882  |
| C | -6.72347 | -3.21308 | 0.33884  |
| H | -5.83627 | -3.00747 | 0.94187  |

113

Optimized structure of triplet state of Pd-2

|    |          |          |          |
|----|----------|----------|----------|
| Pd | -0.00009 | -1.65808 | -0.79753 |
| Cl | 1.60992  | -3.31215 | -0.60086 |
| Cl | -1.6101  | -3.31219 | -0.60107 |
| N  | 1.35552  | -0.09045 | -0.77713 |
| N  | -1.35565 | -0.09035 | -0.77743 |
| C  | 0.71141  | 1.10715  | -0.70569 |
| C  | 1.18067  | 2.49743  | -0.77351 |
| C  | 2.4081   | 3.14611  | -0.8712  |
| H  | 3.34965  | 2.59806  | -0.88302 |
| C  | 2.43162  | 4.56449  | -0.95922 |
| H  | 3.40277  | 5.06009  | -1.02157 |
| C  | 1.27534  | 5.33209  | -0.97315 |
| H  | 1.33792  | 6.42025  | -1.04816 |
| C  | 0.00025  | 4.69641  | -0.90893 |
| C  | 0.00016  | 3.29564  | -0.80131 |
| C  | -1.27473 | 5.33222  | -0.97385 |
| H  | -1.33717 | 6.42038  | -1.04892 |
| C  | -2.4311  | 4.56473  | -0.96057 |
| H  | -3.40217 | 5.06044  | -1.02349 |
| C  | -2.40777 | 3.14635  | -0.87249 |
| H  | -3.34937 | 2.5984   | -0.88482 |
| C  | -1.18047 | 2.49754  | -0.77406 |
| C  | -0.7114  | 1.10724  | -0.70587 |
| C  | 2.73006  | -0.19604 | -0.56367 |
| C  | 3.51281  | -1.00595 | -1.41741 |
| H  | 3.0311   | -1.50208 | -2.25822 |

|   |          |          |          |
|---|----------|----------|----------|
| C | 4.87477  | -1.1464  | -1.19304 |
| H | 5.46442  | -1.77053 | -1.86699 |
| C | 5.51652  | -0.50169 | -0.10931 |
| C | 4.71905  | 0.29219  | 0.75103  |
| H | 5.17702  | 0.75772  | 1.62506  |
| C | 3.35788  | 0.44321  | 0.53333  |
| H | 2.74894  | 1.01609  | 1.23495  |
| C | 6.95068  | -0.73756 | 0.17099  |
| C | 7.41404  | -2.14136 | -0.02155 |
| C | 6.62963  | -3.22164 | 0.43361  |
| H | 5.68708  | -3.02329 | 0.94851  |
| C | 7.04686  | -4.53993 | 0.23721  |
| H | 6.42868  | -5.36146 | 0.60531  |
| C | 8.2444   | -4.80625 | -0.4357  |
| H | 8.56585  | -5.83761 | -0.59713 |
| C | 9.0219   | -3.74397 | -0.91241 |
| H | 9.94929  | -3.94371 | -1.45399 |
| C | 8.61312  | -2.42566 | -0.70607 |
| H | 9.21936  | -1.60171 | -1.08709 |
| C | 7.8001   | 0.26949  | 0.59014  |
| C | 7.44847  | 1.7088   | 0.44477  |
| C | 7.6858   | 2.61965  | 1.49553  |
| H | 8.10121  | 2.2521   | 2.4364   |
| C | 7.38323  | 3.97506  | 1.3509   |
| H | 7.5589   | 4.66055  | 2.18307  |
| C | 6.86482  | 4.45656  | 0.14292  |
| H | 6.64393  | 5.51991  | 0.02514  |
| C | 6.64743  | 3.56891  | -0.91804 |
| H | 6.26625  | 3.93864  | -1.8731  |
| C | 6.93043  | 2.20974  | -0.76771 |
| H | 6.76993  | 1.52337  | -1.60127 |
| C | 9.13088  | -0.00418 | 1.1966   |
| C | 9.29138  | -0.99556 | 2.18696  |
| H | 8.42607  | -1.58287 | 2.49895  |
| C | 10.53525 | -1.22101 | 2.77787  |
| H | 10.63494 | -1.98718 | 3.54998  |

|   |           |          |          |
|---|-----------|----------|----------|
| C | 11.64923  | -0.46753 | 2.38866  |
| H | 12.6231   | -0.64825 | 2.84908  |
| C | 11.50488  | 0.52472  | 1.41236  |
| H | 12.36786  | 1.11897  | 1.10326  |
| C | -2.73013  | -0.19591 | -0.56389 |
| C | -3.35799  | 0.44356  | 0.533    |
| H | -2.74906  | 1.01663  | 1.23448  |
| C | -4.71913  | 0.2925   | 0.75078  |
| H | -5.17709  | 0.75821  | 1.62472  |
| C | -5.51659  | -0.50166 | -0.10934 |
| C | -4.87482  | -1.14662 | -1.19292 |
| H | -5.46445  | -1.77093 | -1.8667  |
| C | -3.51288  | -1.00615 | -1.41737 |
| H | -3.03118  | -1.50243 | -2.25809 |
| C | -6.95071  | -0.73751 | 0.17103  |
| C | -7.80011  | 0.26956  | 0.59023  |
| C | 10.25748  | 0.76246  | 0.83154  |
| H | 10.15043  | 1.54246  | 0.07443  |
| C | -9.13087  | -0.0041  | 1.19671  |
| C | -10.25744 | 0.76267  | 0.83179  |
| H | -10.15037 | 1.54274  | 0.07477  |
| C | -11.50483 | 0.52494  | 1.41263  |
| H | -12.36778 | 1.11928  | 1.10363  |
| C | -11.64921 | -0.46742 | 2.38882  |
| H | -12.62307 | -0.64813 | 2.84926  |
| C | -10.53527 | -1.22101 | 2.7779   |
| H | -10.63497 | -1.98727 | 3.54992  |
| C | -9.2914   | -0.99558 | 2.18696  |
| H | -8.42611  | -1.58298 | 2.49885  |
| C | -6.93017  | 2.20974  | -0.76752 |
| H | -6.76956  | 1.52334  | -1.60104 |
| C | -6.64711  | 3.56891  | -0.91784 |
| H | -6.26576  | 3.9386   | -1.87284 |
| C | -6.86465  | 4.45658  | 0.14307  |
| H | -6.6437   | 5.51992  | 0.02529  |
| C | -7.38326  | 3.97513  | 1.35097  |

|   |          |          |          |
|---|----------|----------|----------|
| H | -7.55904 | 4.66064  | 2.1831   |
| C | -7.68589 | 2.61973  | 1.49559  |
| H | -8.10146 | 2.25221  | 2.43641  |
| C | -7.44843 | 1.70885  | 0.44488  |
| C | -7.41415 | -2.14127 | -0.02158 |
| C | -8.61326 | -2.42546 | -0.70609 |
| H | -9.21946 | -1.60145 | -1.08706 |
| C | -9.02212 | -3.74373 | -0.9125  |
| H | -9.94954 | -3.9434  | -1.45408 |
| C | -8.24467 | -4.80609 | -0.43586 |
| H | -8.56619 | -5.83742 | -0.59735 |
| C | -7.04711 | -4.53988 | 0.23704  |
| H | -6.42897 | -5.36146 | 0.60509  |
| C | -6.6298  | -3.22162 | 0.43351  |
| H | -5.68724 | -3.02334 | 0.94841  |
