# Supplementary material for: Aggregation-induced emission of a bis(imino)acenaphthene zinc complex with tetraphenylethene units
Source: Royal Society of Chemistry journal article supplement (doi:10.1039/d2dt03525a), 2023-01-01
Supplement: d2dt03525a4.pdf [file d2dt03525a4.pdf]

113

Optimized structure of singlet ground state of Zn-2

|    |          |          |          |
|----|----------|----------|----------|
| Zn | -0.00002 | -1.59051 | 0.40888  |
| Cl | -0.00038 | -2.25574 | 2.52236  |
| Cl | 0.00042  | -2.71826 | -1.47545 |
| N  | 1.36046  | 0.07372  | 0.2435   |
| N  | -1.36051 | 0.07376  | 0.24356  |
| C  | 0.75584  | 1.21727  | 0.17184  |
| C  | -0.75585 | 1.21729  | 0.17187  |
| C  | -1.19203 | 2.62529  | 0.17973  |
| C  | -2.41708 | 3.27639  | 0.25203  |
| H  | -3.35914 | 2.72988  | 0.255    |
| C  | -2.43443 | 4.69342  | 0.32626  |
| H  | -3.40239 | 5.196    | 0.37593  |
| C  | -1.27207 | 5.45159  | 0.33658  |
| H  | -1.32901 | 6.54101  | 0.39473  |
| C  | 0.00007  | 4.8158   | 0.28486  |
| C  | 1.27224  | 5.45154  | 0.33638  |
| H  | 1.32924  | 6.54096  | 0.39451  |
| C  | 2.43457  | 4.69333  | 0.32589  |
| H  | 3.40256  | 5.19587  | 0.3754   |
| C  | 2.41716  | 3.2763   | 0.2517   |
| H  | 3.3592   | 2.72975  | 0.25457  |
| C  | 1.19208  | 2.62524  | 0.17962  |
| C  | 0.00004  | 3.40404  | 0.19949  |
| C  | -2.75755 | -0.10995 | 0.17292  |
| C  | -3.53399 | 0.4533   | -0.85629 |
| H  | -3.05331 | 1.05636  | -1.62888 |
| C  | -4.89907 | 0.19045  | -0.91936 |
| H  | -5.48903 | 0.61333  | -1.734   |
| C  | -5.53029 | -0.63527 | 0.03431  |
| C  | -4.72519 | -1.23362 | 1.02608  |
| H  | -5.18298 | -1.90715 | 1.75314  |
| C  | -3.3567  | -0.98645 | 1.09593  |
| H  | -2.73598 | -1.45507 | 1.86324  |
| C  | -6.98663 | -0.93603 | -0.0525  |

|   |           |          |          |
|---|-----------|----------|----------|
| C | -7.34525  | -2.37682 | 0.09827  |
| C | -8.38957  | -2.78258 | 0.95224  |
| H | -8.9576   | -2.02675 | 1.49779  |
| C | -8.69494  | -4.13529 | 1.11445  |
| H | -9.50304  | -4.42938 | 1.78816  |
| C | -7.96595  | -5.11096 | 0.42486  |
| H | -8.20579  | -6.16892 | 0.55243  |
| C | -6.91934  | -4.7233  | -0.41888 |
| H | -6.33892  | -5.47688 | -0.9557  |
| C | -6.60493  | -3.37092 | -0.5725  |
| H | -5.77894  | -3.07795 | -1.22457 |
| C | -7.92316  | 0.04869  | -0.25646 |
| C | -7.59637  | 1.49837  | -0.11174 |
| C | -6.91815  | 1.98125  | 1.02502  |
| H | -6.61418  | 1.27761  | 1.80242  |
| C | -6.65012  | 3.34445  | 1.17485  |
| H | -6.13933  | 3.69848  | 2.07381  |
| C | -7.04782  | 4.25429  | 0.18773  |
| H | -6.84297  | 5.32097  | 0.3067   |
| C | -7.7299   | 3.78999  | -0.9431  |
| H | -8.05063  | 4.49244  | -1.71594 |
| C | -8.01313  | 2.42947  | -1.08433 |
| H | -8.55856  | 2.07575  | -1.96218 |
| C | -9.33731  | -0.24644 | -0.62821 |
| C | -10.3994  | 0.43365  | 0.00098  |
| H | -10.17842 | 1.16214  | 0.78446  |
| C | -11.72557 | 0.17831  | -0.35597 |
| H | -12.53458 | 0.7057   | 0.15487  |
| C | -12.01743 | -0.74487 | -1.36616 |
| H | -13.05388 | -0.93917 | -1.65109 |
| C | -10.97141 | -1.41039 | -2.01565 |
| H | -11.18798 | -2.12216 | -2.81554 |
| C | -9.64629  | -1.16639 | -1.64969 |
| H | -8.83519  | -1.68634 | -2.16267 |
| C | 2.75751   | -0.11001 | 0.17292  |
| C | 3.35663   | -0.98651 | 1.09592  |

|   |          |          |          |
|---|----------|----------|----------|
| H | 2.73589  | -1.45516 | 1.86321  |
| C | 12.01739 | -0.74484 | -1.36613 |
| H | 13.05383 | -0.93912 | -1.65108 |
| C | 4.72512  | -1.23367 | 1.02611  |
| H | 5.1829   | -1.90721 | 1.75318  |
| C | 5.53025  | -0.6353  | 0.03437  |
| C | 4.89906  | 0.19045  | -0.91929 |
| H | 5.48904  | 0.61335  | -1.7339  |
| C | 3.53398  | 0.45329  | -0.85625 |
| H | 3.05332  | 1.05638  | -1.62883 |
| C | 6.98659  | -0.93604 | -0.05235 |
| C | 7.34528  | -2.3768  | 0.09857  |
| C | 6.60514  | -3.37098 | -0.57227 |
| H | 5.77923  | -3.0781  | -1.22448 |
| C | 6.91961  | -4.72334 | -0.41853 |
| H | 6.33933  | -5.47698 | -0.95541 |
| C | 7.96611  | -5.11088 | 0.4254   |
| H | 8.20602  | -6.16881 | 0.55304  |
| C | 8.69491  | -4.13513 | 1.11507  |
| H | 9.50291  | -4.42913 | 1.78893  |
| C | 8.38947  | -2.78244 | 0.95274  |
| H | 8.95736  | -2.02655 | 1.49836  |
| C | 7.9231   | 0.04867  | -0.25642 |
| C | 7.59629  | 1.49838  | -0.11194 |
| C | 8.01312  | 2.42933  | -1.08464 |
| H | 8.5586   | 2.07548  | -1.9624  |
| C | 7.72988  | 3.78987  | -0.94362 |
| H | 8.05065  | 4.49222  | -1.71653 |
| C | 7.04772  | 4.25434  | 0.1871   |
| H | 6.84288  | 5.32103  | 0.3059   |
| C | 6.64995  | 3.34463  | 1.17433  |
| H | 6.13911  | 3.6988   | 2.07321  |
| C | 6.91798  | 1.98141  | 1.0247   |
| H | 6.61395  | 1.27789  | 1.80218  |
| C | 9.33727  | -0.24646 | -0.62814 |
| C | 9.64626  | -1.16648 | -1.64957 |

|   |          |          |          |
|---|----------|----------|----------|
| H | 8.83516  | -1.68651 | -2.16245 |
| C | 10.97138 | -1.41046 | -2.01554 |
| H | 11.18795 | -2.12229 | -2.81538 |
| C | 11.72552 | 0.17839  | -0.356   |
| H | 12.53452 | 0.70585  | 0.15479  |
| C | 10.39935 | 0.43371  | 0.00097  |
| H | 10.17836 | 1.16225  | 0.7844   |

113

Optimized structure of triplet state of Zn-2

|    |          |          |          |
|----|----------|----------|----------|
| Zn | 0.00001  | -1.08013 | 1.53759  |
| Cl | -0.00001 | -1.3741  | 3.73585  |
| Cl | 0.00003  | -2.69918 | 0.02028  |
| N  | 1.35914  | 0.43811  | 0.9171   |
| N  | -1.35914 | 0.4381   | 0.91709  |
| C  | 0.71593  | 1.59369  | 0.62481  |
| C  | -0.71593 | 1.59368  | 0.6248   |
| C  | -1.17891 | 2.97858  | 0.44882  |
| C  | -2.40581 | 3.6343   | 0.45544  |
| H  | -3.34599 | 3.0956   | 0.57632  |
| C  | -2.43145 | 5.04848  | 0.31275  |
| H  | -3.40197 | 5.54944  | 0.30658  |
| C  | -1.27554 | 5.80765  | 0.19324  |
| H  | -1.33922 | 6.89366  | 0.09272  |
| C  | -0.00002 | 5.17039  | 0.22684  |
| C  | 1.27549  | 5.80766  | 0.19328  |
| H  | 1.33916  | 6.89368  | 0.09276  |
| C  | 2.4314   | 5.04851  | 0.31282  |
| H  | 3.40192  | 5.54949  | 0.30667  |
| C  | 2.40578  | 3.63433  | 0.4555   |
| H  | 3.34596  | 3.09564  | 0.57641  |
| C  | 1.17889  | 2.97859  | 0.44885  |
| C  | -0.00001 | 3.76985  | 0.34235  |
| C  | -2.66112 | 0.1508   | 0.62171  |
| C  | -3.37258 | 0.70766  | -0.48168 |
| H  | -2.85596 | 1.38801  | -1.16002 |

|   |           |          |          |
|---|-----------|----------|----------|
| C | -4.67824  | 0.33494  | -0.73523 |
| H | -5.19286  | 0.74758  | -1.60421 |
| C | -5.35015  | -0.62212 | 0.07394  |
| C | -4.61515  | -1.2152  | 1.13648  |
| H | -5.09816  | -1.96798 | 1.7618   |
| C | -3.31316  | -0.84257 | 1.40871  |
| H | -2.76561  | -1.28169 | 2.24645  |
| C | -6.72452  | -1.05424 | -0.22671 |
| C | -7.0016   | -2.50691 | -0.0346  |
| C | -8.14253  | -2.94379 | 0.66766  |
| H | -8.84215  | -2.20511 | 1.06342  |
| C | -8.37569  | -4.30447 | 0.87294  |
| H | -9.25995  | -4.62352 | 1.42918  |
| C | -7.47763  | -5.2566  | 0.37591  |
| H | -7.66188  | -6.32113 | 0.53657  |
| C | -6.33706  | -4.83738 | -0.31759 |
| H | -5.62731  | -5.57225 | -0.7033  |
| C | -6.09545  | -3.47566 | -0.51275 |
| H | -5.19865  | -3.15509 | -1.04765 |
| C | -7.70575  | -0.17124 | -0.65511 |
| C | -7.5638   | 1.30021  | -0.49218 |
| C | -7.11407  | 1.85703  | 0.72403  |
| H | -6.85967  | 1.19286  | 1.55209  |
| C | -7.0133   | 3.24022  | 0.88391  |
| H | -6.67867  | 3.65022  | 1.83965  |
| C | -7.35139  | 4.09849  | -0.16969 |
| H | -7.27219  | 5.18077  | -0.04429 |
| C | -7.80798  | 3.56164  | -1.37953 |
| H | -8.07734  | 4.22398  | -2.20537 |
| C | -7.92699  | 2.17931  | -1.53476 |
| H | -8.29081  | 1.7666   | -2.4782  |
| C | -8.97403  | -0.62971 | -1.27893 |
| C | -10.20182 | -0.02438 | -0.93547 |
| H | -10.21521 | 0.7667   | -0.18257 |
| C | -11.3954  | -0.43687 | -1.53085 |
| H | -12.3369  | 0.03332  | -1.23798 |

|   |           |          |          |
|---|-----------|----------|----------|
| C | -11.38634 | -1.44592 | -2.50059 |
| H | -12.31894 | -1.76323 | -2.97236 |
| C | -10.17316 | -2.04054 | -2.86819 |
| H | -10.15461 | -2.81814 | -3.635   |
| C | -8.98149  | -1.64158 | -2.26223 |
| H | -8.0391   | -2.10548 | -2.55805 |
| C | 2.66112   | 0.15081  | 0.62171  |
| C | 3.31317   | -0.84256 | 1.40871  |
| H | 2.76562   | -1.28166 | 2.24646  |
| C | 11.3863   | -1.44592 | -2.50067 |
| H | 12.31889  | -1.76323 | -2.97248 |
| C | 4.61515   | -1.21519 | 1.13648  |
| H | 5.09816   | -1.96796 | 1.7618   |
| C | 5.35015   | -0.62212 | 0.07392  |
| C | 4.67823   | 0.33493  | -0.73525 |
| H | 5.19284   | 0.74756  | -1.60424 |
| C | 3.37257   | 0.70766  | -0.48169 |
| H | 2.85594   | 1.38799  | -1.16004 |
| C | 6.72451   | -1.05425 | -0.22674 |
| C | 7.00156   | -2.50693 | -0.03468 |
| C | 6.09542   | -3.47564 | -0.51291 |
| H | 5.19865   | -3.15504 | -1.04784 |
| C | 6.33701   | -4.83737 | -0.31781 |
| H | 5.62727   | -5.57222 | -0.70358 |
| C | 7.47755   | -5.25665 | 0.37572  |
| H | 7.66178   | -6.32118 | 0.53633  |
| C | 8.3756    | -4.30454 | 0.87282  |
| H | 9.25983   | -4.62363 | 1.42908  |
| C | 8.14246   | -2.94386 | 0.6676   |
| H | 8.84208   | -2.20521 | 1.06342  |
| C | 7.70576   | -0.17125 | -0.6551  |
| C | 7.56385   | 1.30019  | -0.49207 |
| C | 7.92704   | 2.17935  | -1.53461 |
| H | 8.29082   | 1.76668  | -2.47809 |
| C | 7.80808   | 3.56167  | -1.37929 |
| H | 8.07744   | 4.22405  | -2.2051  |

|   |          |          |          |
|---|----------|----------|----------|
| C | 7.35154  | 4.09846  | -0.16941 |
| H | 7.27239  | 5.18074  | -0.04394 |
| C | 7.01347  | 3.24014  | 0.88415  |
| H | 6.67888  | 3.65009  | 1.83992  |
| C | 7.11419  | 1.85695  | 0.72419  |
| H | 6.85979  | 1.19274  | 1.55221  |
| C | 8.97402  | -0.62972 | -1.27895 |
| C | 8.98144  | -1.64152 | -2.26232 |
| H | 8.03904  | -2.10537 | -2.55817 |
| C | 10.1731  | -2.04047 | -2.86831 |
| H | 10.15452 | -2.81803 | -3.63517 |
| C | 11.39539 | -0.43693 | -1.53086 |
| H | 12.3369  | 0.0332   | -1.23797 |
| C | 10.20183 | -0.02445 | -0.93546 |
| H | 10.21524 | 0.76658  | -0.18251 |
